# Supplementary material for: DNA methylation profiling reveals a pathological signature that contributes to transcriptional defects of CD34+ CD15− cells in early chronic‐phase chronic myeloid leukemia
Source: Mol Oncol. 2018 Apr 27;12(6):814–29. doi: 10.1002/1878-0261.12191 (PMC5983208; doi:10.1002/1878-0261.12191)
Supplement: Supplementary file 9 — Table S2. (XLSX): Details of the primers used in this study. [file MOL2-12-814-s009.pdf]

| Transcript Analysis |              |                          |     |                                 |                   |                                                                     |                                                                                                                                  | Methylation Analysis |                           |                                 |           |                                                                                                                                                                           |                                                                                                                                                             |                              |
|---------------------|--------------|--------------------------|-----|---------------------------------|-------------------|---------------------------------------------------------------------|----------------------------------------------------------------------------------------------------------------------------------|----------------------|---------------------------|---------------------------------|-----------|---------------------------------------------------------------------------------------------------------------------------------------------------------------------------|-------------------------------------------------------------------------------------------------------------------------------------------------------------|------------------------------|
| Locus               | Primer name  | Primer sequences 5' > 3' | Chr | Hg19 primer positions (5' > 3') |                   | PCR Condition                                                       | PCR Amplification                                                                                                                | Primer name          | Primer sequences 5' > 3'  | Hg19 primer positions (5' > 3') |           | PCR Condition                                                                                                                                                             | PCR Amplification                                                                                                                                           | Restriction Enzyme for COBRA |
| Zap70               | ZAP70_tr_F   | CTTCATCGAGCAGGGCAAGC     | 2   | 98354484                        | 98354503          | SYBR Green Buffer 1X (Roche), [Primers F+R]= 0,5µM, cDNA (1/5)= 2µL | Lightcycler 480<br>95°C -> 2min<br>55 Cycles {95°C -> 12s ;<br><b>62°C</b> -> 12s ; 72°C -> 12s}<br>Melting curve<br>40°C -> 10s | ZAP70_Bis_F          | GTATTAGGTTTAGGAAGGTTTGA   | 98340426                        | 98340450  | HotStar Taq Buffer 1X, [dNTP]f = 0,1mM, [MgCl <sub>2</sub> ]f = 1mM, [Primers F+R]f = 0,4µM, <b>HotStar Taq DNA polymerase(Qiagen)</b> = 1U, 1µL bisulfited DNA, qsp 20µL | 95°C -> 15min<br>45 cycles { 95°C -> 30s ; <b>63°C</b> -> 30s ; 72°C -> 20s}<br>72°C -> 10 min                                                              | Taq1                         |
|                     | ZAP70_tr_R   | CTGCTCCACGGTCAGGAAGT     |     | 98355855                        | 98355874          |                                                                     |                                                                                                                                  | ZAP70_Bis_R          | CTCTCACCTCCAAC TTCCAC     | 98340889                        | 98340909  |                                                                                                                                                                           |                                                                                                                                                             |                              |
| GAS2                | GAS_tr_F     | CTAGCCAGCAGACATGAAGCT    | 11  | 22696488                        | 22696508          | SYBR Green Buffer 1X (Roche), [Primers F+R]= 0,5µM, cDNA (1/5)= 2µL | Lightcycler 480<br>95°C -> 2min<br>55 Cycles {95°C -> 12s ;<br><b>62°C</b> -> 12s ; 72°C -> 12s}<br>Melting curve<br>40°C -> 10s | GAS_Bis_F            | AATTTGTGGGGATTAGTATATTTAG | 22687553                        | 22687578  | HotStar Taq Buffer 1X, [dNTP]f = 0,1mM, [MgCl <sub>2</sub> ]f = 1mM, [Primers F+R]f = 0,4µM, <b>HotStar Taq DNA polymerase(Qiagen)</b> = 1U, 1µL bisulfited DNA, qsp 20µL | 95°C -> 15min<br>45 cycles { 95°C -> 30s ; <b>58°C</b> -> 30s ; 72°C -> 20s}<br>72°C -> 10 min                                                              | BstU1                        |
|                     | GAS_tr_R     | CCGAGGGTGCACTGGTTTTG     |     | 22747864                        | 22747883          |                                                                     |                                                                                                                                  | GAS_Bis_R            | AATATCAAAAACAATTATCTCCAAC | 22687677                        | 22687702  |                                                                                                                                                                           |                                                                                                                                                             |                              |
| PRAME               | PRAME_tr_F   | ATTTCCCGGAGAAGGAAGA      | 22  | 22892256                        | 22892275          | SYBR Green Buffer 1X (Roche), [Primers F+R]= 0,5µM, cDNA (1/5)= 2µL | Lightcycler 480<br>95°C -> 2min<br>55 Cycles {95°C -> 12s ;<br><b>62°C</b> -> 12s ; 72°C -> 12s}<br>Melting curve<br>40°C -> 10s | PRAME_Bis_F          | TTTIGAGTTTGTAGAGGATTT     | 22901510                        | 22901531  | HotStar Taq Buffer 1X, [dNTP]f = 0,1mM, [MgCl <sub>2</sub> ]f = 1mM, [Primers F+R]f = 0,4µM, <b>HotStar Taq DNA polymerase(Qiagen)</b> = 1U, 1µL bisulfited DNA, qsp 20µL | 95°C -> 15min<br>45 cycles { 95°C -> 30s ; <b>56°C</b> -> 30s ; 72°C -> 20s}<br>72°C -> 10 min                                                              | HpyCH4IV                     |
|                     | PRAME_tr_R   | GCTGGGACTCTGGGACAGAT     |     | 22890978                        | 22890997          |                                                                     |                                                                                                                                  | PRAME_Bis_R          | CCTCTCCCTTACCAAAA         | 22901785                        | 22901803  |                                                                                                                                                                           |                                                                                                                                                             |                              |
| Inpp5fV2            | IV2_tr_F     | GACGTAATTTTATGGCTTGGCTC  | 10  | 121579005                       | 121579029         | SYBR Green Buffer 1X (Roche), [Primers F+R]= 0,5µM, cDNA (1/5)= 2µL | Lightcycler 480<br>95°C -> 2min<br>55 Cycles {95°C -> 12s ;<br><b>62°C</b> -> 12s ; 72°C -> 12s}<br>Melting curve<br>40°C -> 10s | IV2_Bis_F            | GGGTAGGTAGTTGTTTGAGTTT    | 121578261                       | 121578284 | HotStar Taq Buffer 1X, [dNTP]f = 0,1mM, [MgCl <sub>2</sub> ]f = 1mM, [Primers F+R]f = 0,4µM, <b>HotStar Taq DNA polymerase(Qiagen)</b> = 1U, 1µL bisulfited DNA, qsp 20µL | 95°C -> 15min<br>5 Cycles {95°C -> 30s ; <b>61°C</b> -> 30s ; 72°C -> 40s}<br>40 cycles { 95°C -> 30s ; <b>61°C</b> -> 30s ; 72°C -> 20s}<br>72°C -> 10 min | Taq1                         |
|                     | IV2_tr_R     | ACAGCACATCCACGTCTCTGT    |     | 121580375                       | 121580395         |                                                                     |                                                                                                                                  | IV2_Bis_R            | AAAACAAAACCCTTTAAATATTTTC | 121578682                       | 121578707 |                                                                                                                                                                           |                                                                                                                                                             |                              |
| WT1                 | WT1_Up_tr_F  | CGCTATTCGCAATCAGGGTTAC   | 11  | 32456247-32456262               | 32450166-32450160 | SYBR Green Buffer 1X (Roche), [Primers F+R]= 0,5µM, cDNA (1/5)= 2µL | Lightcycler 480<br>95°C -> 2min<br>55 Cycles {95°C -> 12s ;<br><b>62°C</b> -> 12s ; 72°C -> 12s}<br>Melting curve<br>40°C -> 10s |                      |                           |                                 |           |                                                                                                                                                                           |                                                                                                                                                             |                              |
|                     | WT1_tr_2R    | ATGGGATCCTCATGCTTGAATG   |     | 32450063                        | 32450084          |                                                                     |                                                                                                                                  |                      |                           |                                 |           |                                                                                                                                                                           |                                                                                                                                                             |                              |
| WT1                 | WT1_tr_F     | CCACAGCACAGGGTACGAGA     | 11  | 32421571                        | 32421590          | SYBR Green Buffer 1X (Roche), [Primers F+R]= 0,5µM, cDNA (1/5)= 2µL | Lightcycler 480<br>95°C -> 2min<br>55 Cycles {95°C -> 12s ;<br><b>62°C</b> -> 12s ; 72°C -> 12s}<br>Melting curve<br>40°C -> 10s |                      |                           |                                 |           |                                                                                                                                                                           |                                                                                                                                                             |                              |
|                     | WT1_tr_R     | GCCTGGGTAAGCACACATGA     |     | 32417861                        | 32417880          |                                                                     |                                                                                                                                  |                      |                           |                                 |           |                                                                                                                                                                           |                                                                                                                                                             |                              |
| WT1                 | WT1_Dwn_tr_F | GAGCAGGGCTCTGAGGATTG     | 11  | 32452125                        | 32452144          | SYBR Green Buffer 1X (Roche), [Primers F+R]= 0,5µM, cDNA (1/5)= 2µL | Lightcycler 480<br>95°C -> 2min<br>55 Cycles {95°C -> 12s ;<br><b>62°C</b> -> 12s ; 72°C -> 12s}<br>Melting curve<br>40°C -> 10s |                      |                           |                                 |           |                                                                                                                                                                           |                                                                                                                                                             |                              |
|                     | WT1_tr_2R    | ATGGGATCCTCATGCTTGAATG   |     | 32450063                        | 32450084          |                                                                     |                                                                                                                                  |                      |                           |                                 |           |                                                                                                                                                                           |                                                                                                                                                             |                              |
| SDHA                | SDHA_tr_F    | ACATCGGAACTGCGACTCA      | 5   | 240562                          | 240581            | SYBR Green Buffer 1X (Roche), [Primers F+R]= 0,5µM, cDNA (1/5)= 2µL | Lightcycler 480<br>95°C -> 2min<br>55 Cycles {95°C -> 12s ;<br><b>62°C</b> -> 12s ; 72°C -> 12s}<br>Melting curve<br>40°C -> 10s |                      |                           |                                 |           |                                                                                                                                                                           |                                                                                                                                                             |                              |
|                     | SDHA_tr_R    | TTCTTGCAACACGCTTCCC      |     | 251139                          | 251158            |                                                                     |                                                                                                                                  |                      |                           |                                 |           |                                                                                                                                                                           |                                                                                                                                                             |                              |
| GUSB                | GUSB_tr_F    | CATCGATGACATCACCGTCAC    | 7   | 65444409                        | 65444429          | SYBR Green Buffer 1X (Roche), [Primers F+R]= 0,5µM, cDNA (1/5)= 2µL | Lightcycler 480<br>95°C -> 2min<br>55 Cycles {95°C -> 12s ;<br><b>62°C</b> -> 12s ; 72°C -> 12s}<br>Melting curve<br>40°C -> 10s |                      |                           |                                 |           |                                                                                                                                                                           |                                                                                                                                                             |                              |
|                     | GUSB_tr_R    | ACAGGTTACTGCCCTTGACA     |     | 65441148                        | 65441167          |                                                                     |                                                                                                                                  |                      |                           |                                 |           |                                                                                                                                                                           |                                                                                                                                                             |                              |
| HMBS                | HMBS_tr_F    | AGAGTGATTGCGTGGGTA       | 11  | 11895898                        | 118959004         | Tampon SYBR Green 1X, [Primers F+R]= 0,5µM, cDNA (1/5)= 2µL         | Lightcycler 480<br>95°C -> 2min<br>55 Cycles {95°C -> 12s ;<br><b>62°C</b> -> 12s ; 72°C -> 12s}<br>Melting curve<br>40°C -> 10s |                      |                           |                                 |           |                                                                                                                                                                           |                                                                                                                                                             |                              |
|                     | HMBS_tr_R    | CTTTCAATGTTGCCACCACAC    |     | 118959367                       | 118959387         |                                                                     |                                                                                                                                  |                      |                           |                                 |           |                                                                                                                                                                           |                                                                                                                                                             |                              |
